# Supplementary material for: Prevalence of type 2 diabetes mellitus and hypertension in patient’s visiting the conservative dentistry and endodontics department: a cross-sectional study in Surabaya City
Source: PeerJ. 2024 Jun 28;12:e17638. doi: 10.7717/peerj.17638 (PMC11216211; doi:10.7717/peerj.17638)
Supplement: Supplemental Information 1 [file peerj-12-17638-s001.xlsx]

## Sheet: Sheet1
Sr. No.	Age (in years)	Gender	Systolic Blood pressure (in mmHg)	Diastolic blood pressure (in mmHg)	Random blood sugar (gm/dl)	Referal
1	45	2	117	79	101	1						KEY FOR GENDER
2	60	2	127	80	98	1
3	52	2	117	80	134	2		1	Male
4	37	2	105	71	98	1		2	Female
5	30	2	127	90	167	2
6	68	1	129	79	149	2
7	50	2	107	81	98	1
8	43	2	153	87	155	4
9	66	1	120	60	100	1						KEY FOR REFERRAL
10	73	1	134	79	219	4
11	52	1	111	70	180	4		1	PATIENTS FIT FOR UNDERGOING CONSERVATIVE AND ENDODONTIC TREATMENT
12	41	1	110	70	153	2		2	PATIENTS REFERRED TO HOSPITAL FOR APPROPRIATE CONTROL OF HIGH BLOOD SUGAR
13	90	2	128	91	133	4		3	PATIENTS REFERRED TO HOSPITAL FOR APPROPRIATE CONTROL OF HIGH BLOOD PRESSURE
14	61	1	164	109	133	4		4	PATIENTS REFERRED TO HOSPITAL FOR APPROPRIATE CONTROL OF HIGH BLOOD SUGAR AND HIGH BLOOD PRESSURE
15	48	2	150	95	90	3
16	32	2	113	78	99	1
17	66	1	105	63	192	2
18	56	1	121	81	267	4
19	39	1	133	82	94	3
20	39	2	128	80	96	3
21	58	2	146	97	96	3
22	38	2	132	86	126	4
23	37	1	142	97	112	4
24	47	2	126	76	107	1
25	29	1	138	77	101	3
26	55	1	140	80	132	4
27	39	1	132	80	107	3
28	45	2	139	89	125	4
29	21	2	120	82	107	1
30	54	1	140	92	117	4
31	59	2	122	87	141	2
32	31	1	145	91	86	3
33	59	1	139	86	136	4
34	44	2	127	80	123	2
35	36	2	112	70	146	2
36	58	1	140	72	130	4
37	42	2	99	63	94	1
38	28	2	103	84	107	1
39	39	1	138	78	113	4
40	74	2	144	81	151	4
41	39	1	128	82	119	2
42	54	2	138	76	121	3
43	41	2	127	83	131	2
44	45	2	124	80	284	2
45	50	2	126	82	110	1
46	48	1	129	88	116	2
47	68	1	145	91	155	4
48	38	2	125	87	102	1
49	42	1	131	86	121	4
50	66	1	142	84	149	4
51	41	1	119	87	122	2
52	55	1	107	69	113	2
53	48	1	121	86	123	2
54	32	2	119	87	129	2
55	49	2	121	85	116	1
56	52	1	132	91	123	3
57	49	1	122	83	109	1
58	56	1	129	82	113	1
59	50	2	123	66	107	1
60	59	1	152	83	189	4
61	36	2	126	82	132	2
62	49	2	133	89	216	4
63	64	2	127	71	107	3
64	33	2	147	101	137	4
65	41	2	130	83	117	2
66	59	2	138	85	111	3
67	32	2	129	85	128	2
68	67	2	138	83	109	3
69	52	1	126	81	117	2
70	41	2	137	81	124	4
71	59	1	126	82	239	2
72	63	2	133	91	321	4
73	39	1	120	82	156	2
74	60	1	156	88	272	4
75	37	1	140	85	140	4
76	45	2	135	84	106	3
77	64	1	140	81	140	4
78	45	2	154	84	120	4
79	89	2	135	92	164	4
80	65	2	175	102	86	3
81	42	2	116	73	133	2
82	59	1	135	82	124	4
83	59	1	130	71	254	2
84	40	1	122	82	120	2
85	37	1	130	90	133	2
86	40	2	117	90	101	1
87	57	2	150	84	122	4
88	60	2	128	86	132	2
89	40	1	157	94	151	4
90	37	1	128	77	87	1
91	30	2	115	76	153	2
92	32	2	113	73	133	2
93	39	2	123	91	121	2
94	42	1	131	91	109	3
95	31	2	123	69	259	2
96	20	2	128	91	130	2
97	37	1	164	109	90	3
98	32	2	150	95	99	3
99	38	1	134	74	260	4
100	40	1	126	82	110	1
101	50	1	133	91	130	4
102	61	1	120	82	121	2
103	30	2	144	81	118	3
104	31	2	103	84	270	2
105	42	2	127	80	180	2
106	57	1	134	76	259	4
107	42	2	122	87	110	1
108	49	1	133	89	140	4
109	50	1	135	87	131	4
110	53	2	119	70	111	2
111	32	2	100	63	111	2
112	40	2	113	71	135	2
113	45	1	136	75	160	4
114	35	2	115	75	110	1
115	32	1	125	84	132	2
116	43	1	129	82	140	2
117	45	2	119	79	110	1
118	50	2	135	90	175	4
119	47	2	142	92	140	4
120	40	2	136	82	145	4
121	36	2	137	81	139	4
122	45	1	120	82	135	2
123	36	2	113	72	112	2
124	49	2	136	85	139	4
125	36	1	125	76	106	1
126	39	2	136	85	133	4
127	62	1	138	80	138	4
128	31	2	110	90	126	2
129	60	1	136	92	142	4
130	39	2	129	82	110	1
131	40	1	142	90	145	4
132	60	1	117	81	114	2
133	60	2	126	64	109	1
134	26	2	131	96	110	3
135	45	1	145	95	137	4
136	32	2	135	90	127	4
137	47	1	133	84	110	3
138	52	2	135	91	132	4
139	60	1	127	78	95	1
140	42	1	138	72	139	4
141	42	2	116	73	111	2
142	32	1	186	112	102	3
143	53	1	110	89	128	2
144	76	1	117	66	119	2
145	72	2	118	71	122	2
146	36	1	139	90	179	4
147	25	1	104	69	122	2
148	37	2	126	76	108	1
149	80	1	108	68	432	2
150	57	2	128	79	153	2
151	61	1	109	75	116	2
152	42	2	118	74	179	2
153	45	2	107	71	122	2
154	35	2	132	80	135	4
155	80	1	123	67	228	2
156	68	1	118	69	148	2
157	23	1	124	60	101	1
158	65	2	139	81	98	3
159	57	2	143	80	96	3
160	36	2	139	82	107	3
161	22	2	109	72	113	2
162	26	2	129	80	126	2
163	21	2	129	83	117	2
164	57	2	128	86	132	2
165	37	2	105	71	98	1
166	32	1	132	81	107	3
167	73	2	165	96	95	3
168	72	1	137	79	135	4
169	38	1	128	72	117	2
170	57	1	115	71	223	2
171	54	2	140	92	117	4
172	32	2	105	81	101	1
173	25	1	139	72	128	4
174	38	1	119	77	64	1
175	72	2	118	71	122	2
176	55	2	147	94	137	4
177	40	1	138	72	117	3
178	50	2	122	71	147	2
179	40	2	110	72	143	2
180	22	2	100	69	120	2
181	40	1	119	77	233	2
182	47	1	136	91	218	4
183	23	2	120	77	88	1
184	52	2	165	102	201	4
185	53	1	113	70	91	1
186	45	2	122	73	94	1
187	40	2	114	63	91	1
188	36	2	103	67	107	1
189	60	2	128	76	101	1
190	30	2	116	77	88	1
191	36	2	133	90	79	3
192	58	1	136	102	98	3
193	19	1	120	78	99	1
194	42	2	149	96	110	3
195	38	1	175	118	105	3
196	37	2	130	80	101	1
197	33	1	122	89	88	1
198	28	2	123	88	132	4
199	37	2	105	71	117	4
200	40	1	132	81	128	4
201	35	1	139	78	101	3
202	45	2	115	78	146	2
203	20	2	96	66	112	2
204	70	1	147	75	267	4
205	29	1	123	77	120	2
206	31	1	111	77	130	2
207	28	2	128	88	102	1
208	31	1	129	90	112	2
209	39	1	140	80	160	4
210	45	2	139	90	162	4
211	29	1	117	82	170	2
212	32	2	120	88	180	2
213	30	1	112	92	120	2
214	50	1	128	88	122	2
215	30	1	123	78	109	1
216	32	2	105	81	122	2
217	30	2	137	79	98	3
218	29	2	128	72	177	2
219	37	1	113	70	103	1
220	40	2	128	77	128	2
221	42	1	114	70	122	2
222	40	1	131	91	110	3
223	37	2	113	73	188	2
224	28	2	125	86	129	2
225	45	1	144	93	129	4
226	47	1	164	77	121	4
227	50	2	122	94	172	2
228	58	1	121	84	371	2
229	40	2	119	76	114	4
230	39	2	123	78	170	2
231	42	2	129	93	118	3
232	24	2	112	75	98	1
233	50	1	148	111	87	3
234	45	2	139	92	125	4
235	50	2	132	85	124	4
236	42	1	112	78	128	2
237	58	1	126	84	138	2
238	56	1	148	98	228	4
239	52	1	118	98	138	4
240	61	2	138	78	156	4
241	44	2	132	84	116	3
242	58	1	114	81	138	2
243	63	2	124	77	228	2
244	39	1	110	76	110	1
245	48	1	124	72	198	2
246	63	2	146	92	224	4
247	24	1	131	92	127	4
248	40	1	126	82	110	1
249	57	1	128	81	127	2
250	50	1	115	80	105	1
251	57	1	144	90	137	4
252	52	1	103	60	163	2
253	52	2	112	70	151	2
254	53	1	109	66	110	1
255	47	1	120	80	151	2
256	78	1	130	70	110	1
257	59	1	134	88	109	3
258	70	1	140	85	139	4
259	49	2	121	84	346	2
260	39	2	100	62	105	1
261	62	1	108	72	110	1
262	47	1	160	103	155	4
263	36	2	116	76	130	2
264	36	2	148	100	110	3
265	35	2	114	76	130	2
266	38	2	142	92	145	4
267	28	2	132	68	96	1
268	32	2	135	95	90	3
269	36	2	145	100	85	3
270	26	2	124	84	110	1
271	38	1	100	58	252	2
272	37	2	138	88	115	2
273	45	2	136	92	119	4
274	48	1	120	86	100	1
275	51	1	146	92	210	4
276	17	1	114	76	110	2
277	48	2	124	98	218	2
278	45	2	112	66	110	1
279	50	2	120	85	230	2
280	49	2	124	78	110	1
281	28	1	110	78	130	1
282	38	1	118	78	172	2
283	48	1	128	76	135	2
284	53	1	110	70	153	2
285	35	2	108	66	105	1
286	33	1	134	88	348	4
287	35	2	120	76	100	1
288	53	1	165	100	159	4
289	35	1	108	68	220	2
290	30	2	160	92	165	4
291	46	2	136	88	78	3
292	66	1	124	74	120	2
293	40	2	136	96	105	3
294	34	2	117	84	166	2
295	32	1	122	82	124	1
296	51	1	134	82	252	4
297	48	2	144	92	164	4
298	38	1	117	73	129	1
299	40	2	124	88	237	2
300	40	1	137	81	204	4
301	42	2	122	84	161	2
302	36	2	112	76	122	1
303	52	2	113	73	159	2
304	62	1	158	90	109	3
305	40	2	114	77	110	1
306	60	2	112	55	205	2
307	36	2	110	70	142	2
308	46	2	122	78	182	2
309	26	1	110	60	129	1
310	49	1	137	95	178	4
311	32	2	100	68	114	1
312	26	2	152	91	114	3
313	65	2	185	115	90	3
314	47	1	150	90	90	3
315	53	1	144	80	148	4
316	25	2	121	76	90	1
317	70	2	144	83	144	4
318	45	1	106	63	143	2
319	33	1	137	91	129	3
320	56	1	133	81	110	3
321	50	1	110	70	113	1
322	19	2	138	86	131	4
323	44	2	132	88	216	4
324	29	1	130	80	96	1
325	43	1	108	70	156	2
326	39	2	128	97	156	2
327	51	1	126	83	147	2
328	65	2	120	72	252	2
329	51	1	134	84	110	3
330	53	2	118	80	219	2
331	38	1	120	70	137	2
332	53	1	121	70	206	2
333	44	2	144	95	208	4
334	39	1	165	105	95	3
335	69	1	143	82	140	4
336	65	1	126	72	213	2
337	55	2	129	77	100	1
338	45	2	157	95	151	4
339	20	1	139	87	121	1
340	39	1	123	88	121	1
341	56	1	134	81	206	2
342	38	1	129	87	145	2
343	35	2	113	74	137	2
344	44	1	129	82	105	1
345	43	2	103	70	106	1
346	23	1	121	69	102	1
347	65	1	126	86	123	1
348	32	2	113	66	92	1
349	42	1	159	105	150	4
350	70	2	149	86	272	4
351	63	1	126	77	183	2
352	55	2	117	74	100	1
353	32	2	107	65	105	1
354	24	2	89	58	100	1
355	39	2	126	80	137	2
356	55	2	120	80	127	1
357	35	2	124	70	128	1
358	66	1	137	94	100	3
359	40	2	118	76	174	2
360	20	2	114	68	95	1
361	37	1	148	90	178	4
362	39	1	103	58	117	1
363	39	2	112	73	192	2
364	66	1	119	63	181	2
365	30	2	110	66	102	1
366	54	1	99	66	127	1
367	36	2	119	78	154	2
368	38	2	127	82	153	2
369	35	2	110	76	203	2
370	40	1	210	134	128	3
371	37	1	124	86	105	1
372	59	2	154	100	142	4
373	56	2	114	76	176	2
374	48	2	140	118	142	4
375	55	1	138	88	104	3
376	61	2	128	70	135	2
377	48	2	117	80	103	1
378	27	1	148	86	105	3
379	52	2	117	58	221	2
380	48	2	127	86	222	2
381	48	1	123	83	205	2
382	32	1	115	75	110	1
383	39	1	106	73	114	1
384	39	2	100	60	140	2
385	41	1	114	66	196	2
386	49	1	133	88	283	2
387	43	1	129	84	150	2
388	45	2	112	73	96	1
389	38	1	131	81	138	2
390	59	1	106	62	535	2
391	31	2	103	69	111	1
392	28	2	114	62	110	1
393	45	2	113	82	140	2
394	24	2	97	60	133	2
395	52	2	107	72	124	1
396	29	2	128	68	290	2
397	60	2	119	78	250	2
398	46	2	110	70	266	2
399	26	2	113	73	150	2
400	25	2	98	64	90	1
401	70	2	197	73	155	4
402	45	1	128	89	228	2
403	23	2	110	70	120	1
404	19	2	121	71	150	2
405	61	1	100	60	140	2
406	50	2	110	71	129	2
407	48	1	115	73	187	2
408	51	2	138	73	110	3
409	60	2	132	88	102	3
410	29	2	117	57	122	2
411	56	2	114	72	150	2
412	78	2	220	100	260	4
413	51	2	103	67	146	2
414	54	1	144	78	113	3
415	28	2	130	78	136	2
416	30	2	122	78	137	2
417	35	2	120	74	136	2
418	35	1	128	84	138	2
419	53	2	122	70	104	1
420	53	1	156	92	142	4
421	40	2	128	82	100	1
422	46	2	126	76	317	2
423	55	2	116	67	110	1
424	32	1	128	98	103	1
425	35	2	118	86	125	1
426	43	1	120	90	85	1
427	50	1	120	72	329	2
428	52	2	110	78	195	2
429	43	2	132	92	135	4
430	55	2	124	64	155	2
431	28	1	122	86	220	2
432	46	2	113	65	198	2
433	61	2	136	66	189	4
434	51	2	119	72	111	1
435	32	1	123	78	112	1
436	35	1	120	88	525	2
437	55	2	134	86	110	3
438	41	2	123	90	115	1
439	38	2	126	88	496	2
440	42	2	118	82	200	2
441	40	2	136	88	129	3
442	29	2	118	66	100	1
443	63	2	119	73	223	2
444	72	2	144	83	120	3
445	50	1	122	78	131	2
446	41	2	122	72	111	1
447	49	1	134	90	146	4
448	54	1	117	70	107	1
449	45	2	128	76	142	2
450	47	2	119	79	113	1
451	23	2	102	70	210	2
452	34	2	109	65	108	1
453	56	2	154	93	229	4
454	59	1	121	73	110	1
455	28	1	134	65	150	4
456	40	1	130	90	110	1
457	43	1	115	75	110	1
458	50	2	132	84	127	2
459	67	1	137	79	226	4
460	52	1	129	67	137	2
461	37	1	134	81	114	4
462	52	1	118	74	102	1
463	51	2	146	88	95	3
464	52	2	120	82	139	2
465	62	2	120	76	181	2
466	55	1	148	82	122	4
467	56	2	98	68	121	2
468	36	2	112	60	120	2
469	39	2	126	74	155	2
470	48	1	106	68	111	2
471	43	2	124	78	137	2
472	29	1	128	90	108	1
473	38	1	130	88	220	2
474	53	1	158	110	292	4
475	57	2	124	72	260	2
476	38	1	132	96	258	4
477	40	2	120	78	92	1
478	28	1	143	83	150	4
479	47	1	138	81	151	4
480	41	1	129	69	203	2
481	72	2	112	63	324	2
482	59	2	140	90	110	3
483	43	2	146	92	328	4
484	50	2	138	82	328	2
485	59	1	138	89	235	4
486	64	1	140	80	112	4
487	60	1	142	85	375	4
488	63	1	155	100	220	4
489	64	1	133	91	154	4
490	38	2	103	67	114	2
492	55	1	121	86	114	2
492	48	2	148	97	194	4
493	45	2	143	96	124	4
494	32	2	119	75	125	2
495	45	2	135	85	111	4
496	51	1	144	94	113	4
497	38	1	118	80	112	2
498	31	2	147	96	107	3
499	37	1	119	63	146	2
500	17	1	104	64	250	2
501	40	2	133	83	194	4
502	21	2	134	94	150	4
503	20	2	122	70	95	1
504	66	1	129	69	136	2
505	37	1	126	69	224	2
506	43	2	109	65	80	1
507	50	2	130	90	155	2
508	65	2	154	94	158	4
509	46	1	127	84	150	2
510	58	2	132	84	347	4
511	60	2	136	90	144	4
512	51	1	148	84	143	4
513	64	1	113	66	145	2
514	34	1	128	88	100	1
515	25	1	134	84	95	3
516	29	1	126	78	103	1
517	51	2	150	100	88	3
518	56	2	158	108	215	4
519	34	2	128	88	110	1
520	25	2	128	80	100	1
521	30	1	134	88	105	3
522	63	1	112	70	110	1
523	64	1	122	84	220	2
524	43	2	128	76	193	2
525	51	1	123	82	195	2
526	42	2	128	72	560	2
527	50	2	128	82	105	1
528	48	1	128	88	85	1
529	35	2	128	88	115	2
530	29	2	124	78	180	2
531	28	2	128	88	95	1
532	26	2	110	72	105	1
533	35	1	105	78	190	2
534	48	2	120	80	125	1
535	35	2	128	84	134	2
536	29	2	128	74	143	2
537	39	2	124	68	149	2
538	52	1	88	53	111	1
539	31	2	139	77	168	4
540	35	2	103	65	124	2
541	45	2	140	92	124	4
542	49	2	122	85	174	2
543	22	1	115	73	154	2
544	35	2	100	74	130	2
545	40	2	140	70	129	4
546	45	1	102	66	122	2
547	60	1	131	68	354	2
548	40	2	140	80	140	4
549	48	1	130	78	141	2
550	43	2	130	89	160	2
551	36	2	144	82	140	4
552	50	2	136	80	140	4
553	39	2	132	72	129	4
554	50	1	140	84	164	4
555	60	2	99	75	124	2
556	62	1	108	68	94	1
557	67	1	134	77	147	4
558	52	2	167	99	153	2
559	53	2	120	73	149	2
560	21	2	118	73	159	2
561	18	2	97	62	108	1
562	35	2	92	54	101	1
563	60	1	103	63	102	1
564	38	1	140	80	139	4
565	37	1	130	76	120	2
566	23	2	110	67	121	2
567	42	2	112	74	140	2
568	36	2	153	90	52	3
569	46	2	152	96	96	3
570	45	1	126	68	119	2
571	60	1	120	75	169	2
572	61	1	145	84	283	4
573	40	2	156	91	205	4
574	42	2	113	71	223	2
575	40	2	133	77	158	4
576	52	2	127	81	155	2
577	30	1	119	70	128	2
578	43	2	110	65	109	1
579	59	1	139	79	162	2
580	32	2	109	57	90	1
581	50	2	131	79	91	1
582	58	2	134	71	90	3
583	33	1	130	90	175	2
584	50	2	133	84	85	3
585	53	2	140	91	120	3
586	55	2	125	79	199	2
587	62	1	118	93	106	1
588	50	2	128	82	110	1
589	70	1	130	76	139	2
590	32	2	138	82	136	4
591	45	2	116	78	120	2
592	36	2	132	90	148	4
593	36	1	122	79	196	2
594	50	1	136	75	126	3
595	42	2	140	80	138	4
596	56	1	132	90	140	4
597	22	2	110	80	110	1
598	45	2	114	71	94	1
599	41	1	105	69	80	1
600	57	1	137	82	102	3
601	49	1	142	101	211	4
602	38	2	119	89	105	1
603	31	2	110	72	115	2
604	58	1	146	90	100	3
605	61	2	119	82	220	2
606	33	2	126	83	149	2
603	52	2	128	78	152	2
608	45	2	105	73	142	2
609	30	1	114	76	94	1
610	48	2	124	83	94	1
611	50	2	100	59	179	2
612	29	1	84	56	93	1
613	53	1	138	94	301	4
614	52	2	129	84	162	2
615	56	1	127	81	105	1
616	40	1	112	82	105	1
617	53	1	131	81	107	1
618	47	2	128	84	101	1
619	48	2	108	64	103	1
620	36	1	164	110	133	2
621	61	1	145	94	297	4
622	49	2	147	104	105	3
623	47	2	97	60	227	2
624	38	2	128	88	173	3
625	45	2	116	88	106	1
626	29	2	98	69	199	2
627	49	2	115	80	113	2
628	35	2	116	64	145	2
629	71	2	133	85	149	4
630	44	2	140	90	258	4
631	54	2	143	105	198	4
632	54	1	135	88	135	4
633	43	2	108	64	146	2
634	46	2	149	73	130	4
635	52	1	144	97	183	4
636	53	2	142	88	150	4
637	48	2	142	84	123	4
638	44	2	116	74	105	1
639	64	2	104	68	132	2
640	49	2	122	85	174	2
641	54	2	132	70	135	4
642	35	1	120	75	119	2
643	51	1	139	73	126	4
644	63	1	135	90	142	4
645	32	1	121	75	113	2
646	40	2	137	90	145	4
647	35	1	129	85	124	2
648	45	1	143	79	135	4
649	43	2	136	72	140	4
650	55	2	143	92	160	4
651	50	2	111	73	100	1
652	37	1	129	69	120	1
653	29	2	113	72	116	1
654	35	1	106	74	102	1
655	52	2	136	81	175	4
656	38	1	123	78	125	1
657	43	1	119	80	136	2
658	32	1	125	82	124	2
659	52	1	136	93	131	4
660	43	2	107	66	133	2
661	41	1	130	79	129	2
662	41	2	102	63	176	2
663	42	2	129	72	130	2
664	32	1	132	70	134	4
665	45	2	155	94	275	4
666	47	2	105	57	142	2
667	45	2	123	86	140	2
668	30	1	135	72	136	4
669	41	2	129	85	128	4
670	40	2	129	81	104	1
671	43	2	123	80	288	2
672	48	1	139	80	200	4
673	45	1	99	65	120	2
674	47	2	105	68	121	2
675	82	2	150	80	100	3
676	42	2	100	63	98	1
677	40	2	143	96	88	3
678	30	2	121	85	399	2
679	38	2	127	82	125	2
680	37	2	121	75	169	2
681	29	2	97	64	110	1
682	58	2	121	71	98	1
683	30	1	126	78	116	1
684	37	2	116	78	116	2
685	41	2	128	78	119	2
686	36	2	132	70	234	4
687	32	2	131	68	164	2
688	48	2	93	62	149	2
689	53	1	126	88	163	2
690	62	2	108	62	110	1
691	49	2	126	80	169	2
692	32	2	116	72	144	2
693	27	2	98	53	120	2
694	45	2	136	89	112	3
695	47	2	106	53	183	2
696	38	1	144	89	146	4
697	45	2	120	81	117	2
698	25	2	107	77	116	2
699	38	2	136	117	115	4
700	46	2	123	83	196	2
701	26	2	119	84	117	2
702	21	1	127	83	96	1
703	55	2	117	76	168	2
704	21	2	126	79	111	1
705	45	1	124	79	129	2
706	35	2	116	78	112	2
707	42	2	105	68	96	1
708	55	1	135	80	132	4
709	46	1	120	84	185	2
710	30	2	134	85	141	4
711	49	1	121	78	121	2
712	29	2	90	53	111	1
713	43	2	95	77	105	1
714	40	1	105	70	98	1
715	45	2	140	94	100	3
716	61	1	145	109	96	3
717	53	2	116	96	119	2
718	48	1	126	92	118	2
719	38	2	118	77	211	2
720	41	1	112	68	118	1
721	39	2	116	96	111	1
722	33	2	102	76	96	1
723	39	2	116	80	106	1
724	63	2	142	85	375	4
725	51	2	146	80	95	3
726	62	1	116	76	108	1
727	49	2	136	87	207	4
728	35	2	129	69	126	2
729	60	1	121	74	185	2
730	40	2	120	76	132	2
731	47	2	119	80	125	2
732	35	1	137	90	136	4
733	40	2	121	75	132	2
734	53	1	110	69	144	2
735	36	2	112	76	203	2
736	35	1	107	79	110	1
737	26	2	112	72	112	1
738	40	1	123	87	137	2
739	46	1	121	76	134	2
740	62	1	118	93	106	1
741	60	2	129	75	129	2
742	35	2	113	75	120	2
743	65	2	143	68	125	4
744	45	2	157	96	149	4
745	50	1	140	80	135	4
746	35	2	130	91	126	2
747	36	1	133	103	104	3
748	40	1	129	90	122	2
749	60	1	120	75	130	2
750	32	2	115	79	109	1
751	53	1	135	92	127	4
752	37	2	132	70	119	4
753	40	2	119	69	114	2
754	45	2	132	67	125	4
755	30	1	123	77	102	1
756	41	2	120	69	115	1
757	47	2	133	79	175	4
758	41	2	115	73	129	2
759	33	2	118	74	221	2
760	84	1	126	96	93	1
761	21	2	110	70	129	2
762	29	2	104	75	122	2
763	37	2	132	94	110	4
764	40	1	150	94	112	3
765	44	2	136	90	146	4
766	61	1	121	80	124	2
767	35	1	93	62	121	2
768	50	2	127	77	130	2
769	40	1	136	82	123	4
770	35	2	133	89	110	3
771	42	1	144	85	128	4
772	24	1	136	72	130	4
773	50	1	140	82	140	4
774	45	1	132	82	132	4
775	32	1	128	93	125	2
776	41	2	130	70	175	2
777	32	2	132	72	150	4
778	34	1	140	75	132	4
779	51	2	115	85	134	2
780	35	2	134	84	122	4
781	41	2	141	83	132	4
782	46	2	128	76	128	2
783	48	1	108	60	106	1
784	53	1	110	64	206	2
785	45	2	108	79	105	1
786	45	2	125	77	241	2
787	35	1	112	64	187	2
788	45	1	112	79	114	1
789	60	1	105	60	171	2
790	42	1	131	75	165	2
791	65	2	110	66	208	2
792	61	1	130	87	114	2
793	33	1	131	77	173	2
794	49	2	147	78	276	4
795	45	1	157	97	101	3
796	43	2	130	77	334	2
797	34	2	99	69	110	1
798	45	2	112	69	173	2
799	39	2	130	86	172	2
800	47	1	144	81	110	3
801	52	1	122	75	82	1
802	58	1	112	62	137	2
803	45	2	117	73	81	1
804	42	2	114	64	133	2
805	28	1	125	77	121	2
806	25	2	104	63	100	1
807	43	1	126	80	93	1
808	46	2	103	61	95	1
809	24	1	140	63	86	3
810	70	1	144	88	83	3
811	19	1	88	48	48	1
812	45	1	113	63	122	2
813	39	2	147	79	105	3
814	42	1	127	87	106	1
815	34	2	114	65	133	2
816	61	1	146	72	103	3
817	48	1	121	86	123	2
818	32	2	119	87	129	2
819	49	2	121	85	116	1
820	52	1	132	91	123	3
821	49	1	122	83	109	1
822	56	1	129	82	113	1
823	50	2	123	66	107	1
824	59	1	152	83	189	4
825	36	2	126	82	132	2
826	49	2	133	89	216	4
827	64	2	127	71	107	3
828	33	2	147	101	137	4
829	41	2	130	83	117	2
830	59	2	138	85	111	3
831	32	2	129	85	128	2
832	67	2	138	83	109	3
833	52	1	126	81	117	2
834	41	2	137	81	124	4
835	59	1	126	82	239	2
836	63	2	133	91	321	4
837	39	1	120	82	156	2
838	60	1	156	88	272	4
839	42	2	114	64	133	2
840	28	1	125	77	121	2
841	25	2	104	63	100	1
842	43	1	126	80	93	1
843	46	2	103	61	95	1
844	24	1	140	63	86	3
845	70	1	144	88	83	3
846	19	1	88	48	48	1
847	45	1	113	63	122	2
848	39	2	147	79	105	3
849	42	1	127	87	106	1
850	34	2	114	65	133	2
851	61	1	146	72	103	3
852	48	1	121	86	123	2
853	32	2	119	87	129	2
854	49	2	121	85	116	1
855	52	1	132	91	123	3
856	49	1	122	83	109	1
857	56	1	129	82	113	1
858	50	2	123	66	107	1
859	59	1	152	83	189	4
860	36	2	126	82	132	2
861	49	2	133	89	216	4
862	59	1	126	82	239	2
863	63	2	133	91	321	4
864	39	1	120	82	156	2
865	60	1	156	88	272	4
866	42	2	114	64	133	2
867	28	1	125	77	121	2
868	25	2	104	63	100	1
869	43	1	126	80	93	1
870	46	2	103	61	95	1
871	24	1	140	63	86	3
872	70	1	144	88	83	3
873	19	1	88	48	48	1
874	45	1	113	63	122	2
875	39	2	147	79	105	3
876	42	1	127	87	106	1
877	34	2	114	65	133	2
878	61	1	146	72	103	3
879	48	1	121	86	123	2
880	32	2	119	87	129	2
881	49	2	121	85	116	1
882	47	2	142	92	140	4
883	40	2	136	82	145	4
884	36	2	137	81	139	4
885	45	1	120	82	135	2
886	36	2	113	72	112	2
887	49	2	136	85	139	4
888	36	1	125	76	106	1
889	39	2	136	85	133	4
890	62	1	138	80	138	4
891	31	2	110	90	126	2
892	60	1	136	92	142	4
893	39	2	129	82	110	1
894	40	1	142	90	145	4
895	60	1	117	81	114	2
896	60	2	126	64	109	1
897	26	2	131	96	110	3
898	45	1	145	95	137	4
899	32	2	135	90	127	4
900	47	1	133	84	110	3
901	52	2	135	91	132	4
902	60	1	127	78	95	1
903	42	1	138	72	139	4
904	42	2	116	73	111	2
905	32	1	186	112	102	3
906	53	1	110	89	128	2
907	76	1	117	66	119	2
908	72	2	118	71	122	2
909	36	1	139	90	179	4
910	25	1	104	69	122	2
911	37	2	126	76	108	1
912	80	1	108	68	432	2
913	57	2	128	79	153	2
914	61	1	109	75	116	2
915	42	2	118	74	179	2
916	45	2	107	71	122	2
917	35	2	132	80	135	4
918	80	1	123	67	228	2
919	68	1	118	69	148	2
920	23	1	124	60	101	1
921	65	2	139	81	98	3
922	57	2	143	80	96	3
923	36	2	139	82	107	3
924	22	2	109	72	113	2
925	26	2	129	80	126	2
926	21	2	129	83	117	2
927	57	2	128	86	132	2
928	37	2	105	71	98	1
929	32	1	132	81	107	3
930	73	2	165	96	95	3
931	72	1	137	79	135	4
932	38	1	128	72	117	2
933	57	1	115	71	223	2
934	54	2	140	92	117	4
935	32	2	105	81	101	1
936	25	1	139	72	128	4
937	38	1	119	77	64	1
938	72	2	118	71	122	2
939	55	2	147	94	137	4
940	40	1	138	72	117	3
941	50	2	122	71	147	2
942	40	2	110	72	143	2
943	22	2	100	69	120	2
944	40	1	119	77	233	2
945	47	1	136	91	218	4
946	23	2	120	77	88	1
947	52	2	165	102	201	4
948	53	1	113	70	91	1
949	45	2	122	73	94	1
950	40	2	114	63	91	1
951	36	2	103	67	107	1
952	24	1	140	63	86	3
953	70	1	144	88	83	3
954	19	1	88	48	48	1
955	45	1	113	63	122	2
956	39	2	147	79	105	3
957	42	1	127	87	106	1
958	34	2	114	65	133	2
959	61	1	146	72	103	3
960	48	1	121	86	123	2
961	32	2	119	87	129	2
962	49	2	121	85	116	1
963	47	2	142	92	140	4
964	40	2	136	82	145	4
965	36	2	137	81	139	4
966	45	1	120	82	135	2
967	36	2	113	72	112	2
968	49	2	136	85	139	4
969	36	1	125	76	106	1
970	39	2	136	85	133	4
971	62	1	138	80	138	4
972	31	2	110	90	126	2
973	60	1	136	92	142	4
974	39	2	129	82	110	1
975	40	1	142	90	145	4
976	60	1	117	81	114	2
977	60	2	126	64	109	1
978	26	2	131	96	110	3
979	45	1	145	95	137	4
980	32	2	135	90	127	4
981	47	1	133	84	110	3
982	52	2	135	91	132	4
983	60	1	127	78	95	1
984	42	1	138	72	139	4
985	42	2	116	73	111	2
986	32	1	186	112	102	3
987	53	1	110	89	128	2
988	76	1	117	66	119	2
989	72	2	118	71	122	2
990	36	1	139	90	179	4
991	25	1	104	69	122	2
992	37	2	126	76	108	1
993	80	1	108	68	432	2
994	57	2	128	79	153	2
995	61	1	109	75	116	2
996	42	2	118	74	179	2
997	45	2	107	71	122	2
998	35	2	132	80	135	4
999	80	1	123	67	228	2
1000	68	1	118	69	148	2
1001	23	1	124	60	101	1
1002	65	2	139	81	98	3
1003	57	2	143	80	96	3
1004	36	2	139	82	107	3
1005	22	2	109	72	113	2
1006	26	2	129	80	126	2
1007	21	2	129	83	117	2
1008	57	2	128	86	132	2
1009	37	2	105	71	98	1
1010	32	1	132	81	107	3
1011	73	2	165	96	95	3
1012	72	1	137	79	135	4
1013	38	1	128	72	117	2
1014	57	1	115	71	223	2
1015	54	2	140	92	117	4
1016	32	2	105	81	101	1
1017	25	1	139	72	128	4
1018	38	1	119	77	64	1
1019	72	2	118	71	122	2
1020	42	2	116	73	133	2
1021	59	1	135	82	124	4
1022	59	1	130	71	254	2
1023	40	1	122	82	120	2
1024	37	1	130	90	133	2
1025	40	2	117	90	101	1
1026	57	2	150	84	122	4
1027	60	2	128	86	132	2
1028	40	1	157	94	151	4
1029	37	1	128	77	87	1
1030	30	2	115	76	153	2
1031	32	2	113	73	133	2
1032	39	2	123	91	121	2
1033	42	1	131	91	109	3
1034	31	2	123	69	259	2
1035	20	2	128	91	130	2
1036	37	1	164	109	90	3
1037	32	2	150	95	99	3
1038	38	1	134	74	260	4
1039	40	1	126	82	110	1
1040	50	1	133	91	130	4
1041	61	1	120	82	121	2
1042	30	2	144	81	118	3
1043	31	2	103	84	270	2
1044	42	2	127	80	180	2
1045	57	1	134	76	259	4
1046	42	2	122	87	110	1
1047	49	1	133	89	140	4
1048	50	1	135	87	131	4
1049	53	2	119	70	111	2
1050	32	2	100	63	111	2
1051	40	2	113	71	135	2
1052	45	1	136	75	160	4
1053	35	2	115	75	110	1
1054	32	1	125	84	132	2
1055	57	2	143	80	96	3
1056	36	2	139	82	107	3
1057	22	2	109	72	113	2
1058	26	2	129	80	126	2
1059	21	2	129	83	117	2
1060	57	2	128	86	132	2
1061	37	2	105	71	98	1
1062	32	1	132	81	107	3
1063	73	2	165	96	95	3
1064	72	1	137	79	135	4
1065	38	1	128	72	117	2
1066	57	1	115	71	223	2
1067	54	2	140	92	117	4
1068	32	2	105	81	101	1
1069	25	1	139	72	128	4
1070	38	1	119	77	64	1
1071	72	2	118	71	122	2
1072	42	2	116	73	133	2
1073	59	1	135	82	124	4
1074	59	1	130	71	254	2
1075	40	1	122	82	120	2
1076	37	1	130	90	133	2
1077	40	2	117	90	101	1
1078	57	2	150	84	122	4
1079	60	2	128	86	132	2
1080	40	1	157	94	151	4
1081	37	1	128	77	87	1
1082	30	2	115	76	153	2
1083	32	2	113	73	133	2
1084	39	2	123	91	121	2
1085	42	1	131	91	109	3
1086	31	2	123	69	259	2
1087	20	2	128	91	130	2
1088	37	1	164	109	90	3
1089	32	2	150	95	99	3
1090	38	1	134	74	260	4
1091	40	1	126	82	110	1
1092	45	1	113	63	122	2
1093	39	2	147	79	105	3
1094	42	1	127	87	106	1
1095	34	2	114	65	133	2
1096	61	1	146	72	103	3
1097	48	1	121	86	123	2
1098	32	2	119	87	129	2
1099	49	2	121	85	116	1
1100	47	2	142	92	140	4
